# Supplementary material for: Insertion of sodium phosphaethynolate, Na[OCP], into a zirconium–benzyne complex
Source: Royal Society of Chemistry journal article supplement (doi:10.1039/c7cc01482a), 2017-01-01
Supplement: c7cc01482a1.pdf [file c7cc01482a1.pdf]

## Electronic Supplementary Information

### Insertion of Sodium Phosphaethynolate, Na[OCP], into a Zirconium-Benzyne Complex

Jerod M. Kieser,<sup>a</sup> Robert J. Gilliard Jr.,<sup>a,b</sup> Arnold L. Rheingold,<sup>c</sup> Hansjörg Grützmacher<sup>b</sup> and John D. Protasiewicz<sup>a</sup>

<sup>a</sup> Department of Chemistry, Case Western Reserve University, 2080 Adelbert Rd., Cleveland, Ohio, 44106 (USA)

<sup>b</sup> Department of Chemistry and Applied Biosciences, ETH-Hönggerberg, 8093 Zürich (Switzerland)

<sup>c</sup> Department of Chemistry and Biochemistry, University of California, San Diego, La Jolla, California, 92093 (USA)

E-mail: protasiewicz@case.edu; gruetzmacher@inorg.chem.ethz.ch

#### Content

|                                     |     |
|-------------------------------------|-----|
| 1. General                          | S1  |
| 2. Experimental Procedures          | S1  |
| 3. NMR Spectra                      | S3  |
| 4. X-Ray Crystal Structure Analysis | S14 |
| 5. References                       | S16 |

## 1. General

All reactions were performed under an atmosphere of rigorously dry and oxygen-free nitrogen using either an MBraun glove box or standard Schlenk line techniques. Unless otherwise stated, all chemicals were purchased from commercial sources and used without further purification. Tetrahydrofuran was purified using an MBraun solvent purification system. Benzene was distilled over sodium benzophenone ketyl prior to use. Chloroform-d and dichloromethane-d<sub>2</sub> were dried over alumina or 3 Å molecular sieves and degassed prior to use. [Cp<sub>2</sub>Zr(C<sub>6</sub>H<sub>4</sub>)(PMe<sub>3</sub>)] (**1**)<sup>1</sup> and Na[OCP]<sup>2</sup> were prepared following literature procedures. Solution NMR spectra were recorded on a Bruker AVANCE III 500 or Varian Inova 400 spectrometers and chemical shifts referenced to residual solvent signal (<sup>1</sup>H and <sup>13</sup>C) or to 85% H<sub>3</sub>PO<sub>4</sub> (<sup>31</sup>P). Unless otherwise stated, <sup>13</sup>C and <sup>31</sup>P NMR spectra were <sup>1</sup>H-decoupled. Solid-state <sup>31</sup>P MAS NMR spectrum was recorded on a Bruker AVANCE III 800 spectrometer using a 2.5 mm rotor with a spinning rate of 30 kHz and chemical shift (δ) referenced to Na<sub>2</sub>HPO<sub>4</sub> as an external standard (2.3 ppm).<sup>3</sup> Elemental Analysis was performed by Robertson Microlit Laboratories (Ledgewood, NJ).

## 2. Experimental Procedures

### Compound **2**

To a solution of Na[OCP]·Dioxane<sub>2.5</sub> (1.70 g, 5.6 mmol) in 50 mL THF was added a solution of **1** (2.11 g, 5.6 mmol) in 5 mL THF. The resulting dark red solution was stirred at room temperature for 24 hours. During this time, **2** precipitated from solution and was collected by filtration through a fine porosity filter funnel. The precipitate was washed with additional THF and dried under reduced pressure to give a bright red insoluble solid (1.26 g, 43%). Single crystals were obtained by carefully layering a solution of Na[OCP] in THF on top of a solution of **1** in THF in a thin glass tube and allowing to sit undisturbed for 24 hours. <sup>31</sup>P MAS NMR (324 MHz): δ 50.6.

### Compound **3**

To a suspension of **2** (0.47 g, 0.45 mmol) in 25 mL THF was added trimethylchlorosilane (0.12 mL, 0.95 mmol) which slowly formed a cloudy red-orange solution upon stirring for 30 minutes. Removal of volatiles under reduced pressure produced a bright orange powder. Crude product was dissolved in 50 mL THF, filtered, and filtrate evaporated under reduced pressure to afford a bright orange powder (0.37 g, 96%). Analytically pure single crystals were produced through recrystallization from benzene. <sup>1</sup>H NMR (CDCl<sub>3</sub>, 500 MHz): δ 0.47 (s, 18H), 5.90 (s, 20H), 6.93-6.95 (m, 4H), 7.19-7.22 (m, 4H). <sup>13</sup>C{<sup>1</sup>H} NMR (CDCl<sub>3</sub>, 126 MHz): δ 1.77 (s), 105.53 (s), 119.66 (t, J<sub>PC</sub> = 6.55 Hz), 122.14 (s), 124.09 (s), 141.46 (s), 152.18 (t, J<sub>PC</sub> = 5.43 Hz), 186.16 (t, J<sub>PC</sub> = 6.26 Hz), 209.10 (d, J<sub>PC</sub> = 21.02 Hz). <sup>31</sup>P{<sup>1</sup>H} NMR (CDCl<sub>3</sub>, 202 MHz): δ 193.97. Anal. Calcd. for C<sub>40</sub>H<sub>46</sub>O<sub>2</sub>P<sub>2</sub>Zr<sub>2</sub>: C, 55.91; H, 5.40. Found: C, 55.79; H, 5.28.

#### Compound 4

**A)** To a suspension of **2** (36 mg, 0.034 mmol) in 1 mL dichloromethane- $d_2$  was added a solution of HCl in Dioxane (0.21 mmol). After mixing, the reaction mixture was filtered to yield a bright yellow solution containing **4** and  $Cp_2ZrCl_2$ .  $^1H$  NMR ( $CD_2Cl_2$ , 500 MHz):  $\delta$  4.20 (d,  $^1J_{PH} = 219.6$  Hz, 2H), 6.48 ( $Cp_2ZrCl_2$ , s, 10H), 7.49 (t,  $J = 7.6$  Hz, 2H), 7.60 (t,  $J = 7.5$  Hz, 1H), 7.85 (d,  $J = 7.7$  Hz, 2H).  $^{13}C\{^1H\}$  NMR ( $CD_2Cl_2$ , 126 MHz):  $\delta$  116.65 ( $Cp_2ZrCl_2$ ), 127.97 (d,  $J_{PC} = 5.04$  Hz), 129.29, 134.31, 140.50 (d,  $J_{PC} = 27.47$  Hz), 211.93 (d,  $J_{PC} = 30.10$  Hz).  $^{31}P$  NMR  $^1H$  Coupled ( $CD_2Cl_2$ , 202 MHz):  $\delta$  -107.90 (t,  $^1J_{PH} = 219.7$  Hz).

**B)** To a suspension of **3** (29 mg, 0.034 mmol) in 1 mL  $CD_2Cl_2$  was added  $H_2O$  (2  $\mu L$ , 0.1 mmol). The bright orange suspension slowly turned to a clear, light orange solution and after 30 minutes was analyzed by multinuclear NMR. Spectra show complete conversion of **3** to **4** as well as unidentified byproducts containing zirconocene or trimethylsilyl functionality.  $^1H$  NMR ( $CD_2Cl_2$ , 500 MHz):  $\delta$  4.22 (d,  $J = 219.7$  Hz, 2H), 7.50 (t,  $J = 7.6$  Hz, 2H), 7.61 (t,  $J = 7.4$  Hz, 1H), 7.86 (d,  $J = 7.6$  Hz, 2H).  $^{13}C\{^1H\}$  NMR ( $CD_2Cl_2$ , 126 MHz):  $\delta$  127.98 (d,  $J_{PC} = 5.07$  Hz), 129.31, 134.33, 140.51 (d,  $J_{PC} = 27.40$ ), 212.02, (d,  $J_{PC} = 30.13$ ).  $^{31}P$  NMR  $^1H$  Coupled ( $CD_2Cl_2$ , 202 MHz):  $\delta$  -107.74 (t,  $J_{PC} = 219.7$  Hz).

### 3. NMR Spectra

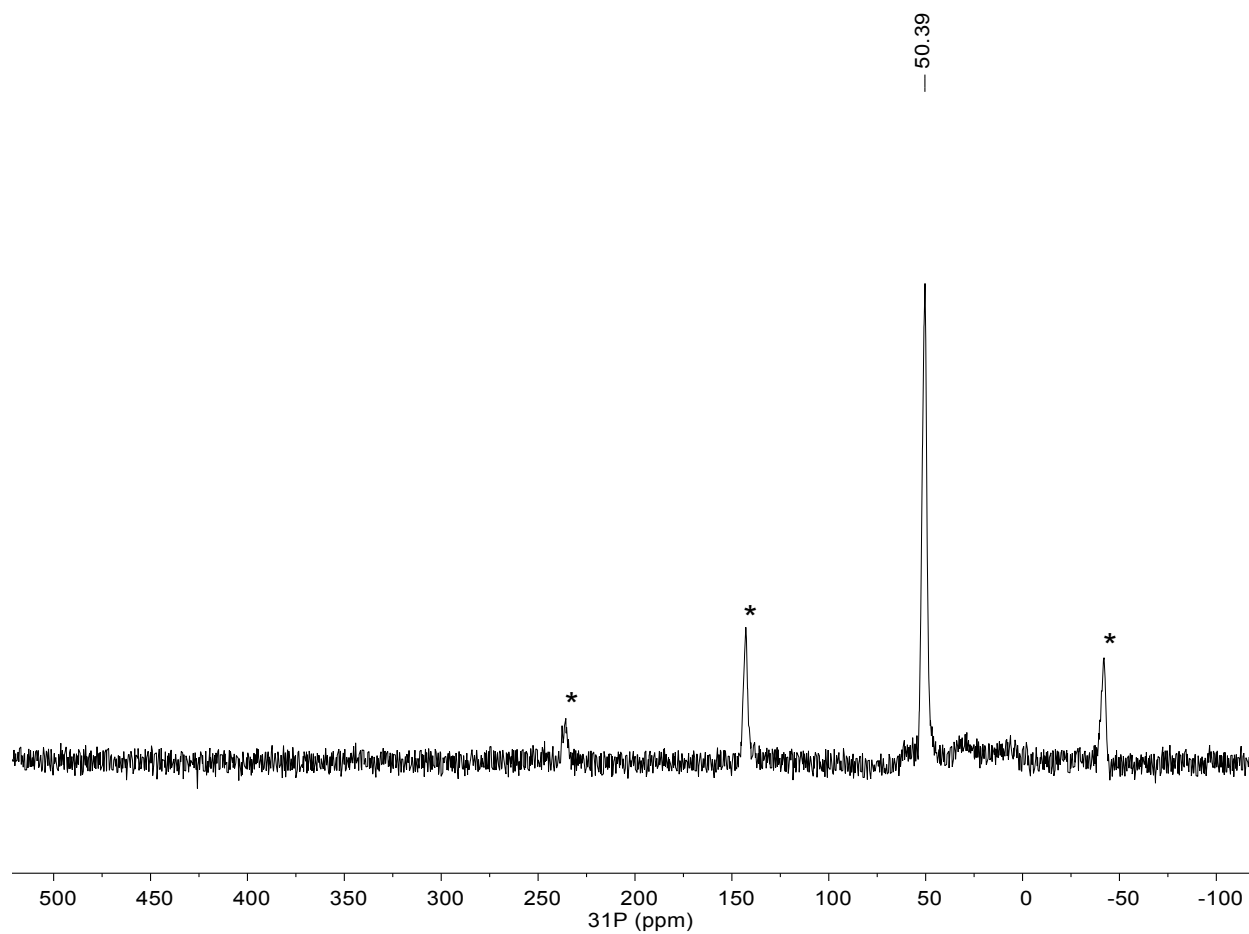

**Figure S1.**  $^{31}\text{P}$  MAS NMR (324 MHz) spectrum of **2** at 30 kHz spinning rate, spinning sidebands marked.

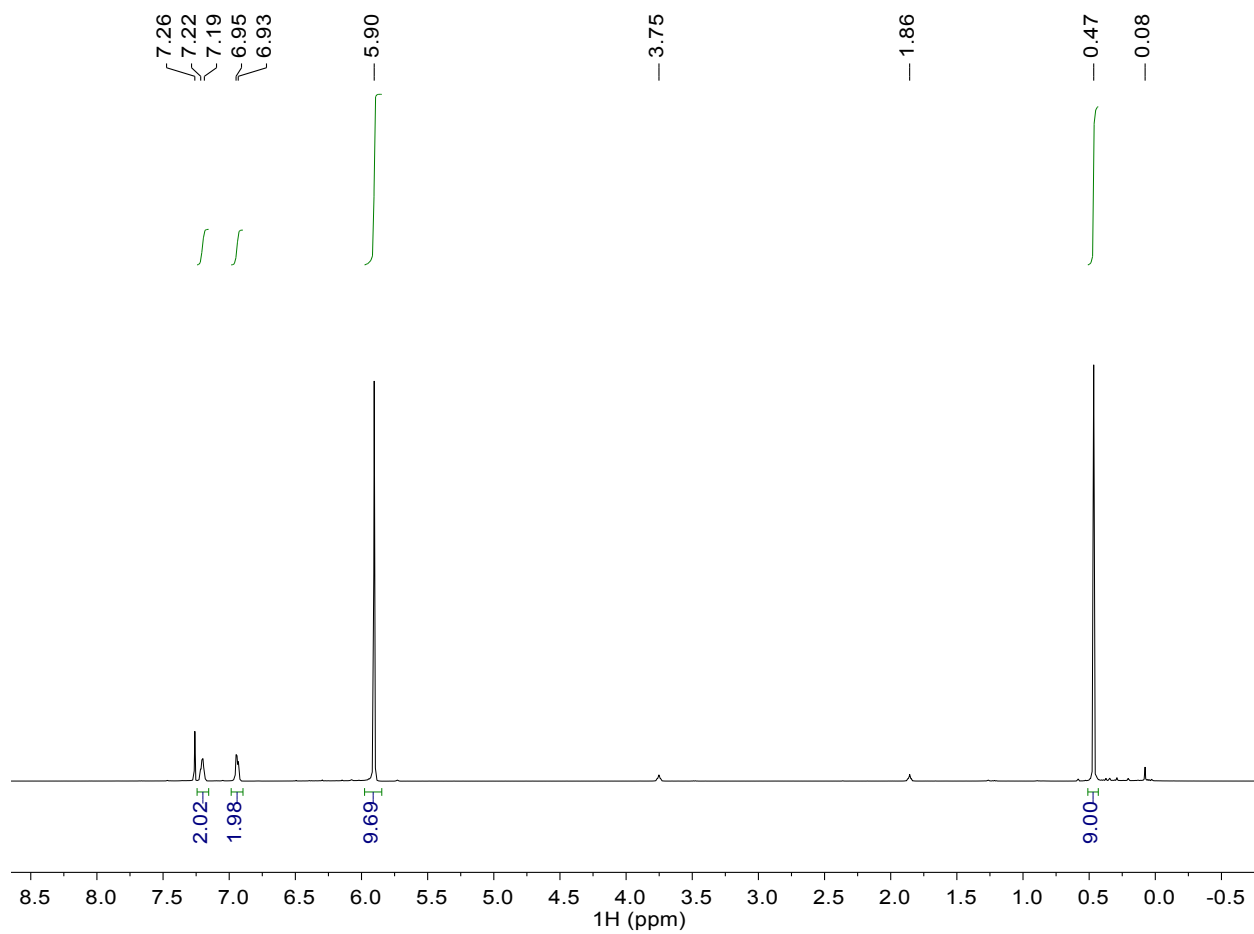

**Figure S2.**  $^1\text{H}$  NMR (500 MHz,  $\text{CDCl}_3$ ) spectrum of bulk **3**.

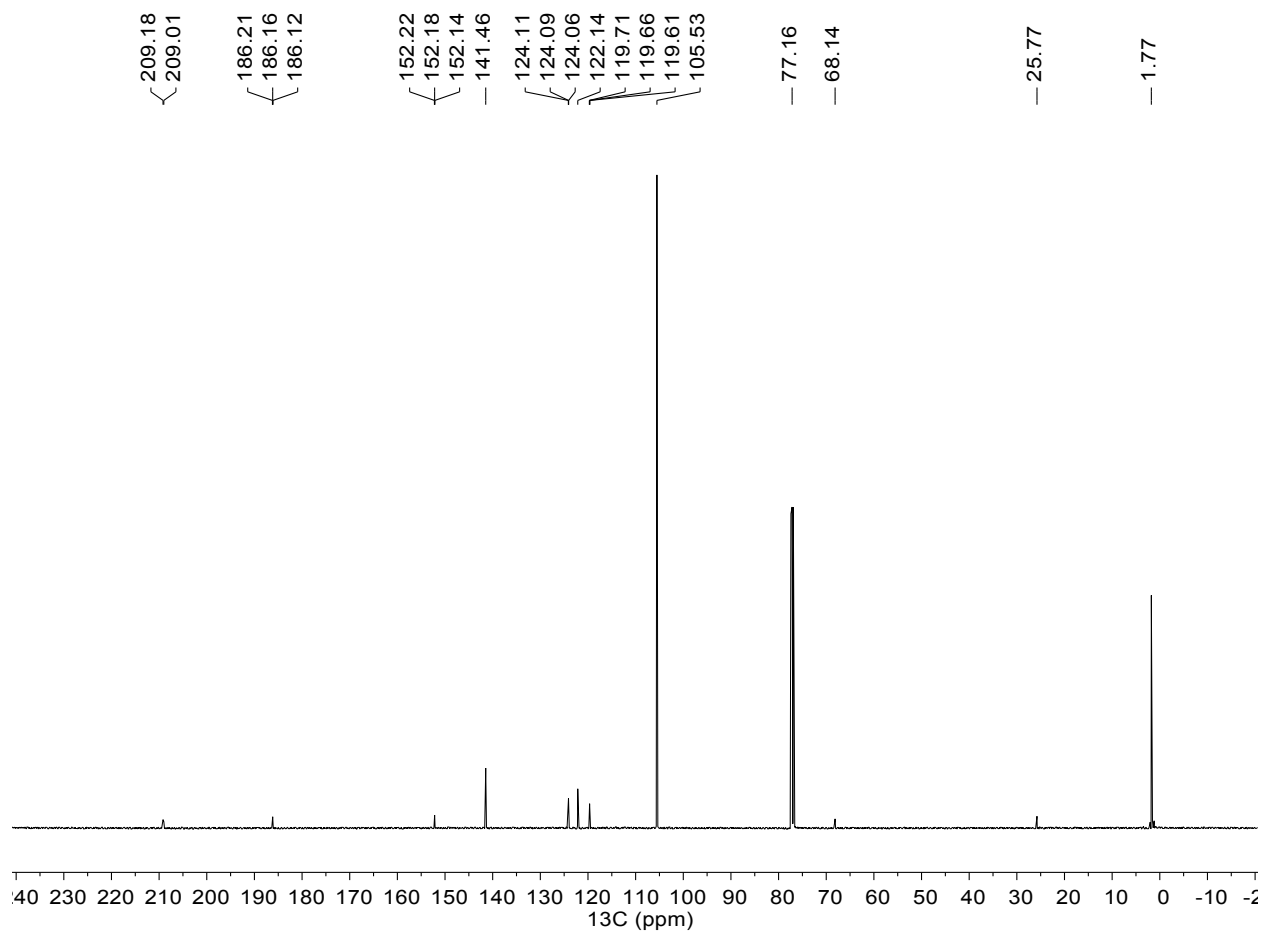

**Figure S3.**  $^{13}\text{C}\{^1\text{H}\}$  NMR (126 MHz,  $\text{CDCl}_3$ ) spectrum of bulk **3**.

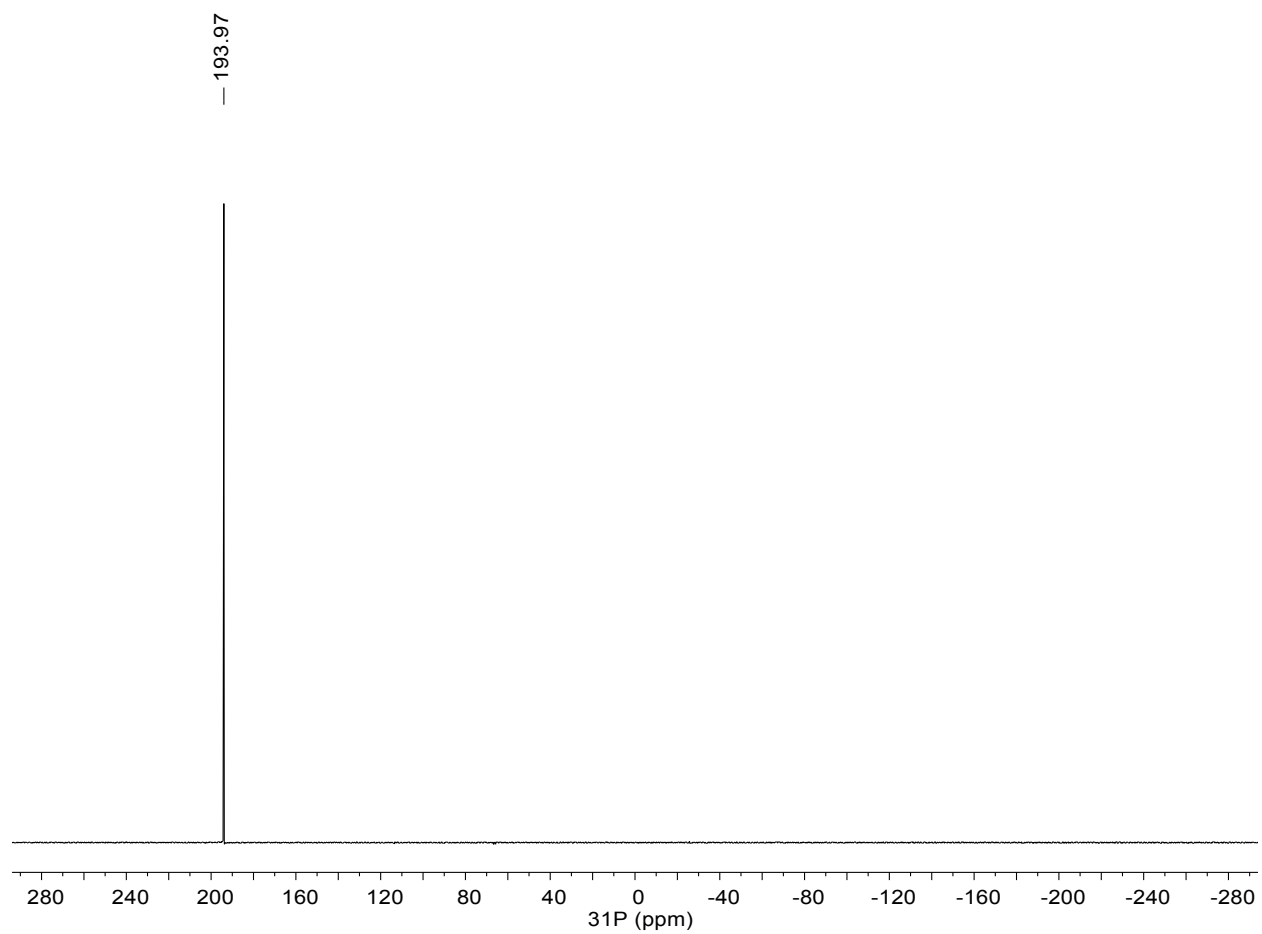

**Figure S4.**  $^{31}\text{P}$  NMR (202 MHz,  $\text{CDCl}_3$ ) spectrum of bulk **3**.

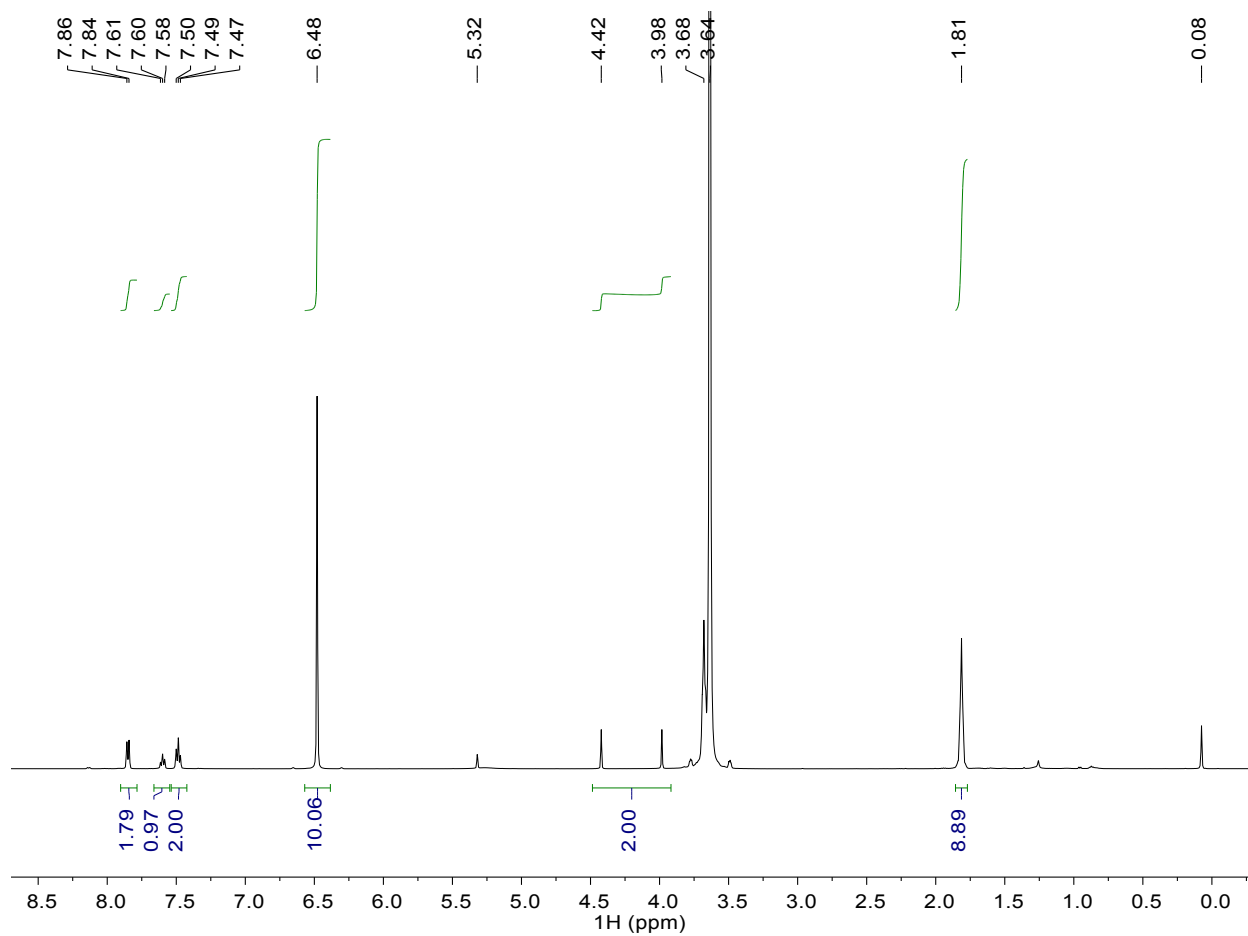

**Figure S5.**  $^1\text{H}$  NMR (500 MHz,  $\text{CD}_2\text{Cl}_2$ ) spectrum of reaction mixture containing **4** and  $\text{Cp}_2\text{ZrCl}_2$  using procedure **A**.



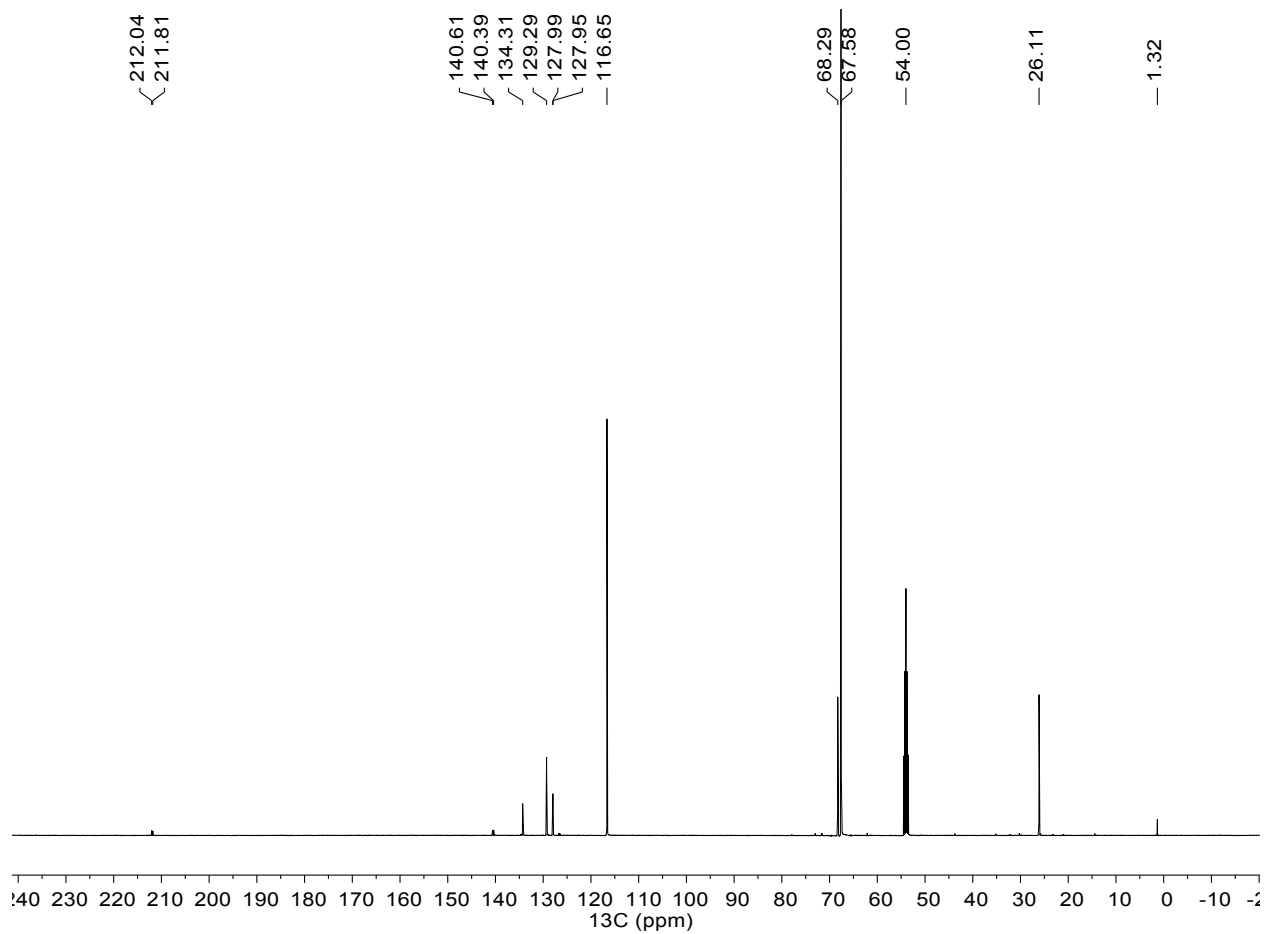

**Figure S6.**  $^{13}\text{C}\{^1\text{H}\}$  NMR (126 MHz,  $\text{CD}_2\text{Cl}_2$ ) spectrum of reaction mixture containing **4** and  $\text{Cp}_2\text{ZrCl}_2$  using procedure **A**.

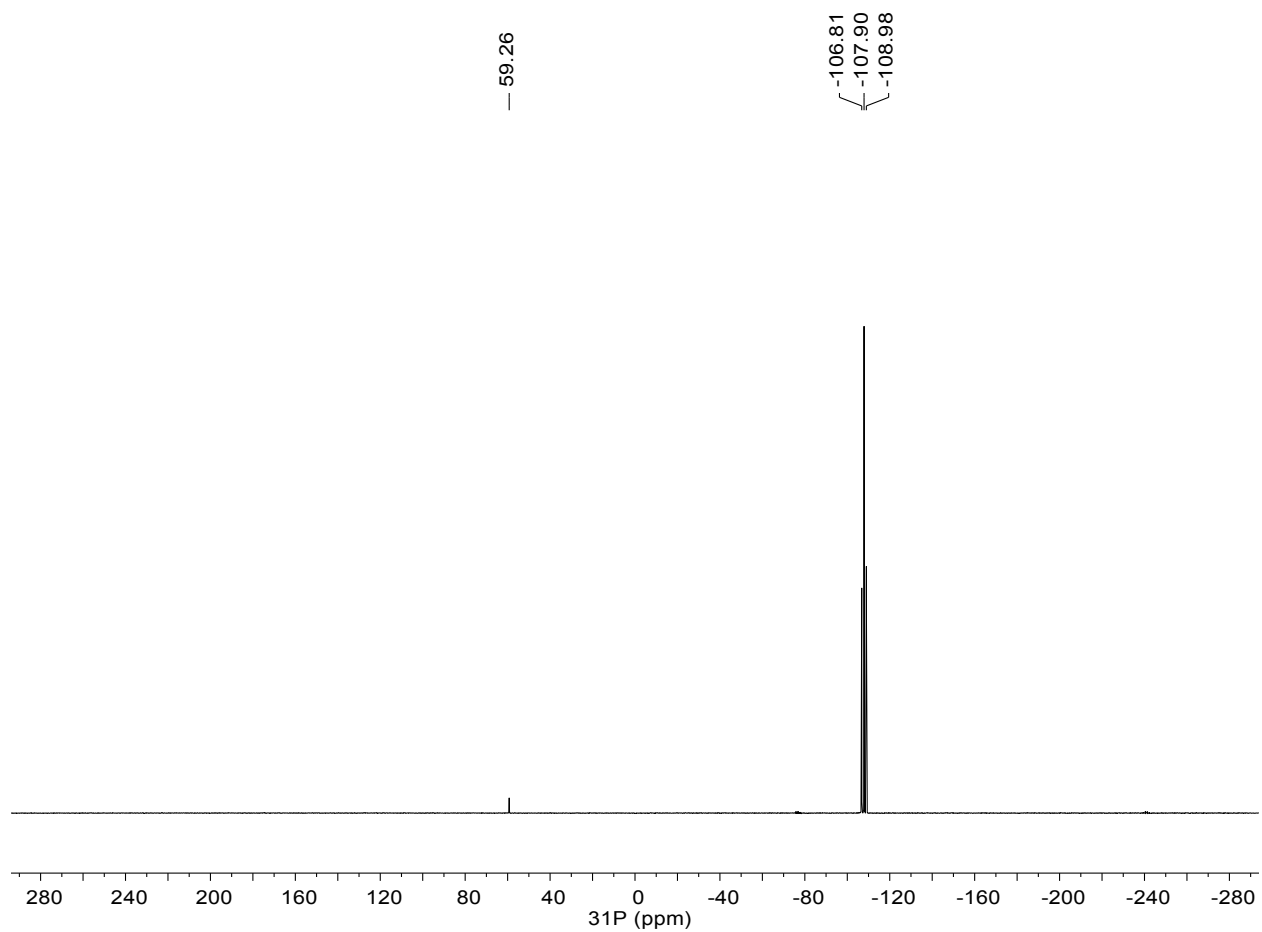

**Figure S7.**  $^{31}\text{P}$  NMR (202 MHz,  $\text{CD}_2\text{Cl}_2$ ) spectrum of reaction mixture containing **4** and  $\text{Cp}_2\text{ZrCl}_2$  using procedure **A**.

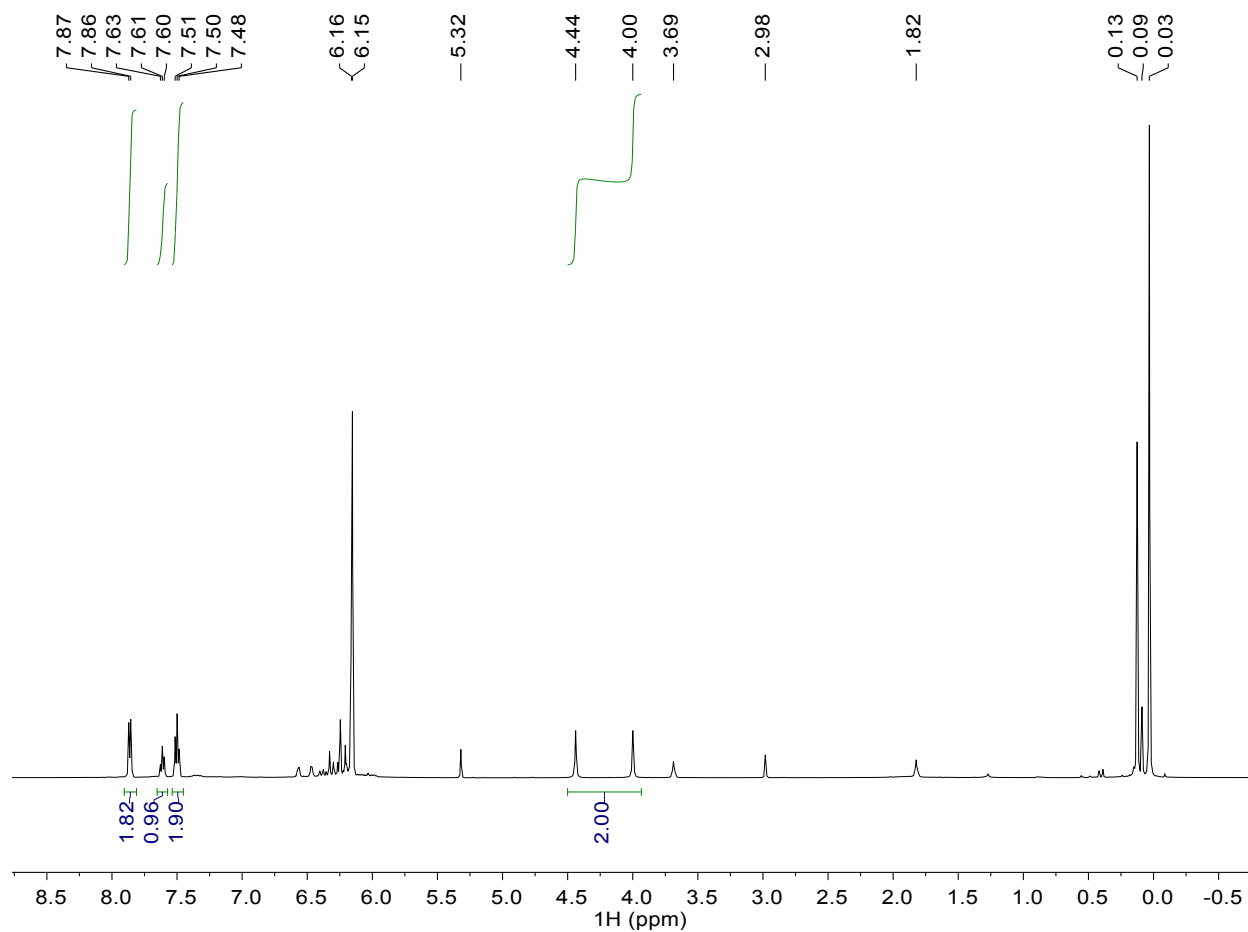

**Figure S8.**  $^1\text{H}$  NMR (500 MHz,  $\text{CD}_2\text{Cl}_2$ ) spectrum of reaction mixture containing **4** using procedure **B**.

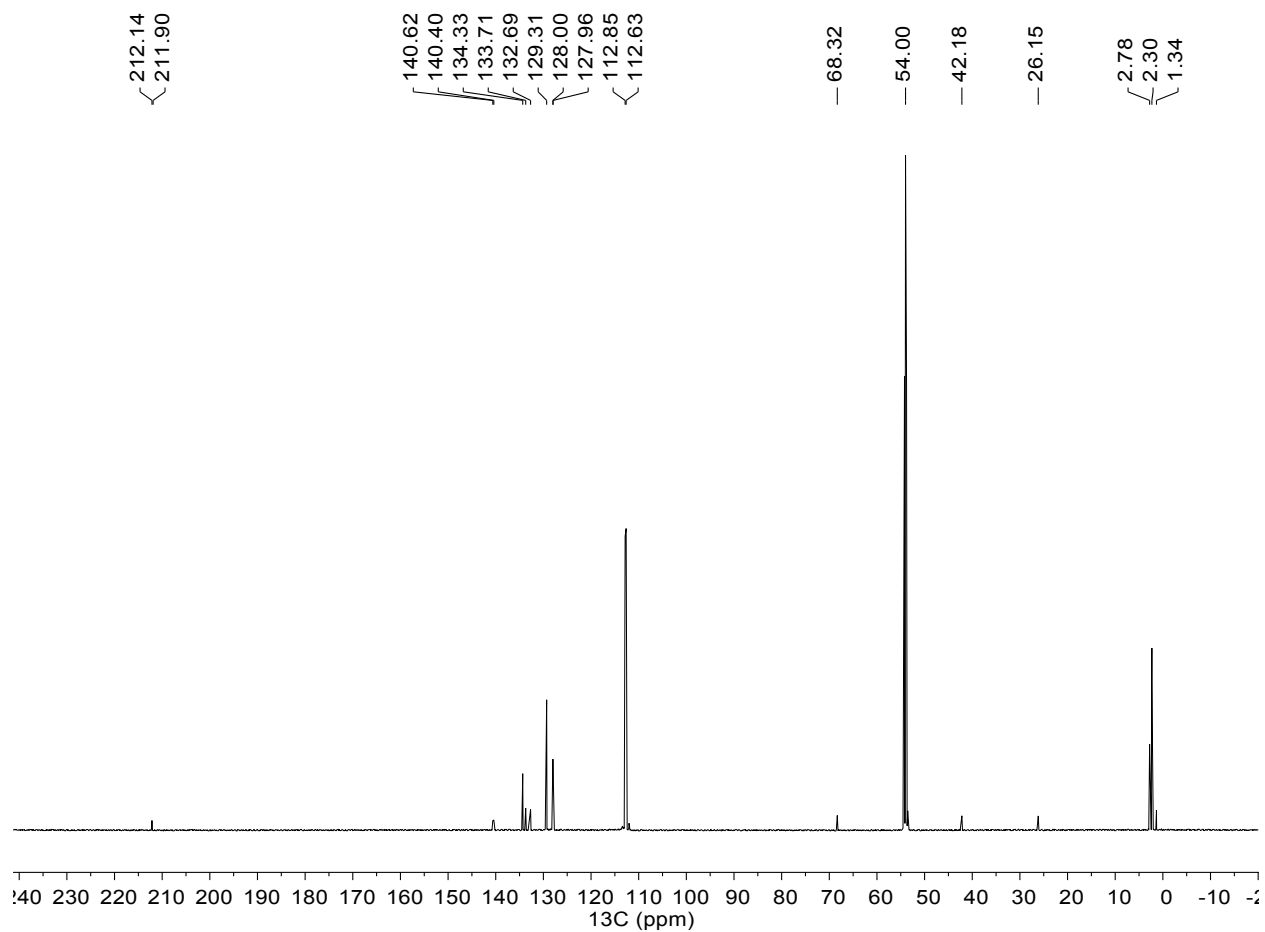

**Figure S9.**  $^{13}\text{C}\{^1\text{H}\}$  NMR (126 MHz,  $\text{CD}_2\text{Cl}_2$ ) spectrum of reaction mixture containing **4** using procedure **B**.

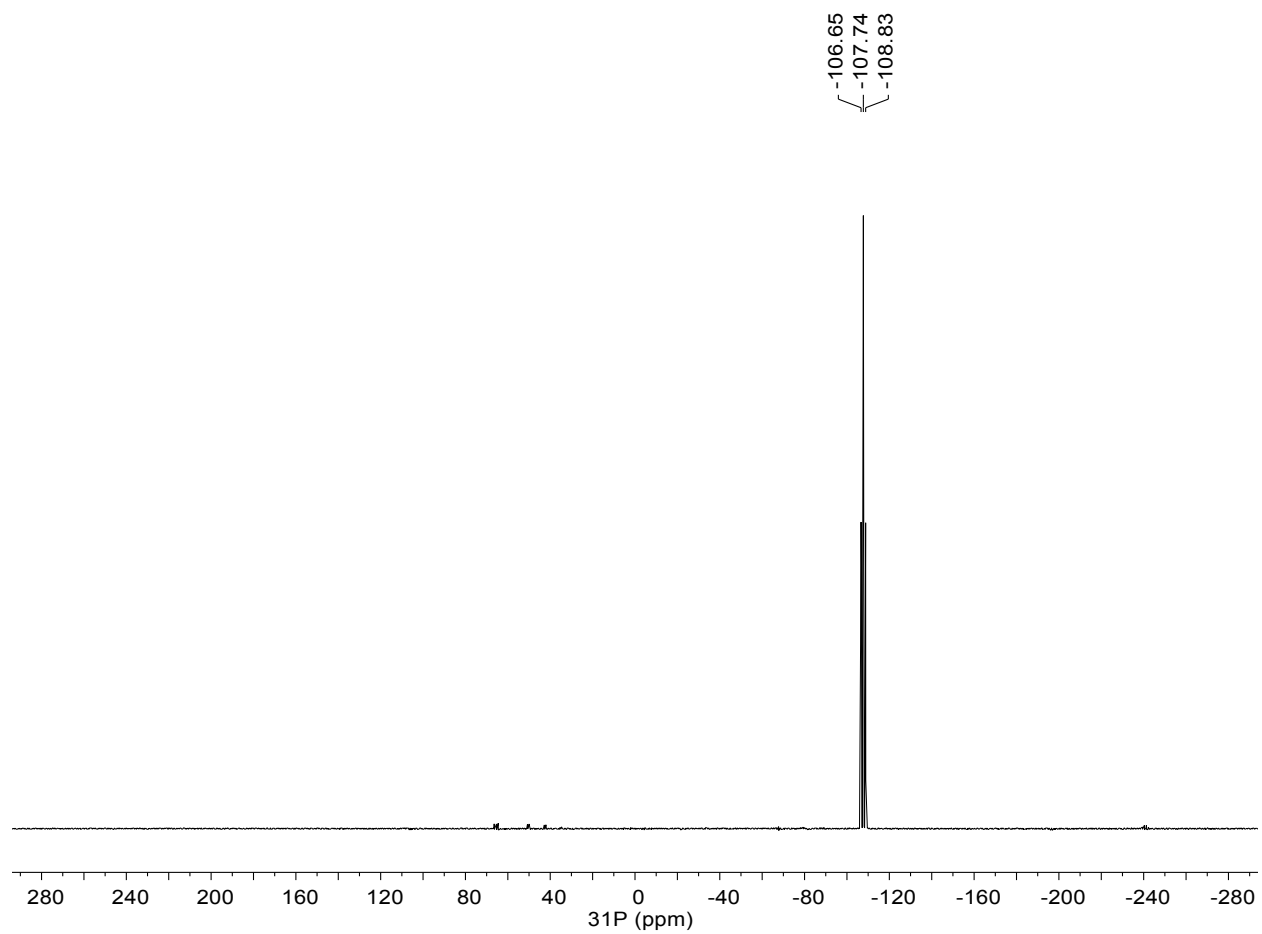

**Figure S10.**  $^{31}\text{P}$  NMR  $^1\text{H}$  Coupled (202 MHz,  $\text{CD}_2\text{Cl}_2$ ) spectrum of reaction mixture containing **4** using procedure **B**.

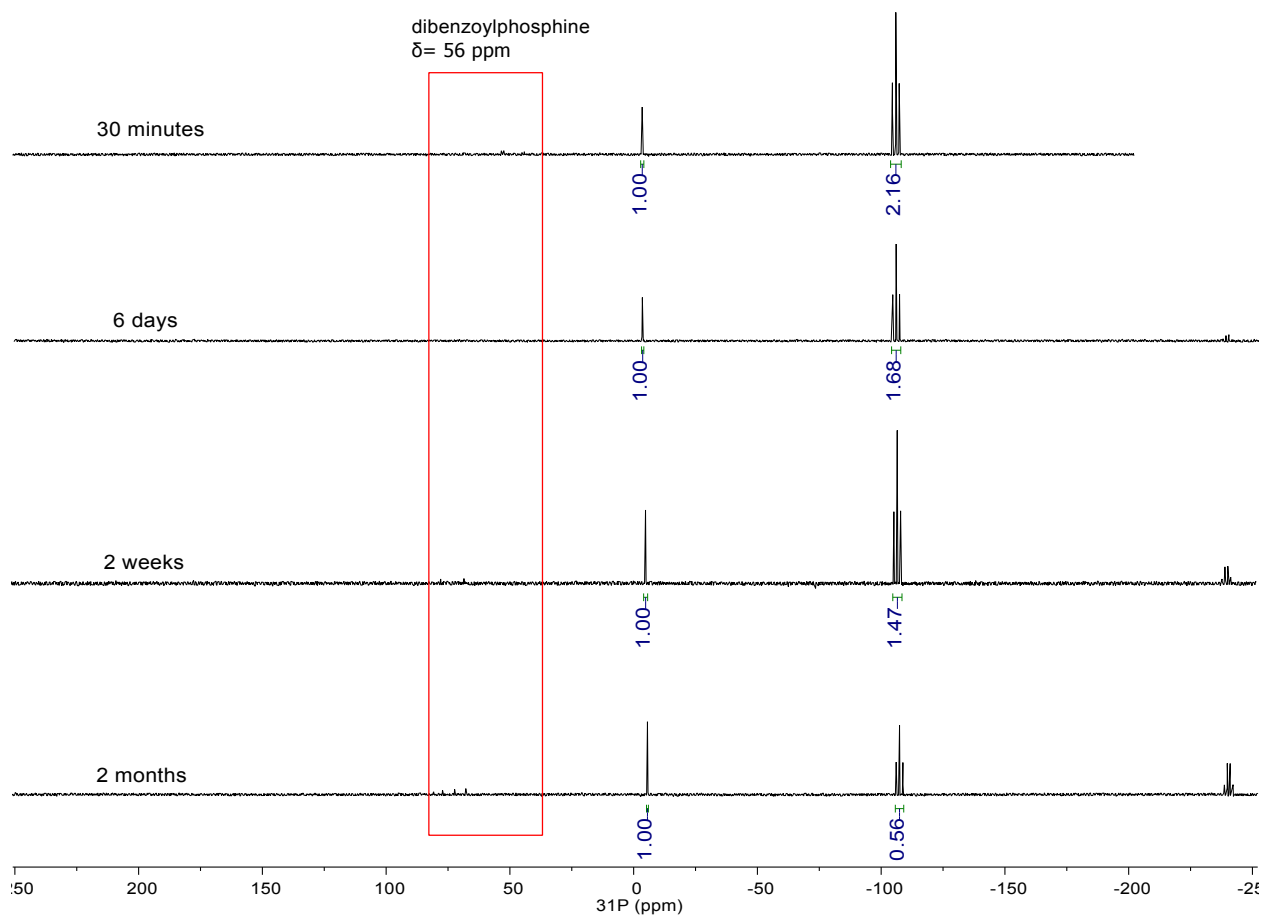

**Figure S11.**  $^{31}\text{P}$  NMR  $^1\text{H}$  Coupled (162 MHz,  $\text{CH}_2\text{Cl}_2$ ) spectra of sealed tube containing reaction mixture of **4** using procedure **B**, sample tube stored in ambient conditions for 2 months. Half-life was calculated to be approximately 35 days, however lack of concurrent formation of dibenzoylphosphine suggests decomposition was due to imperfect seal on tube resulting in hydrolysis to benzoic acid and phosphane.

#### 4. X-Ray Crystal Structure Analysis

Single crystals of **2** were grown by carefully layering a solution of Na[OCP] in THF on top of a solution of **1** in THF and allowing to stand undisturbed for 24 hours. Single crystals of **3** were obtained from recrystallization in benzene. Crystallographic data for both **2** and **3** are collected in Table 1. For both, data were collected with a Bruker Ultra rotating-anode system equipped with microfocus optics using Mo radiation. All procedures employed are part of Bruker APEX3 software systems (Bruker XRD, Madison, WI). Structure refinement without restraint employed OLEX2 software.<sup>4</sup>

**Table S1.** Crystal Data and Structure Refinement

| Compound                          | <b>2</b>                                             | <b>3</b>                                                                                      |
|-----------------------------------|------------------------------------------------------|-----------------------------------------------------------------------------------------------|
| Empirical Formula                 | C <sub>29</sub> H <sub>38</sub> NaO <sub>4</sub> PZr | C <sub>40</sub> H <sub>46</sub> O <sub>2</sub> P <sub>2</sub> Si <sub>2</sub> Zr <sub>2</sub> |
| Formula Weight                    | 595.77                                               | 859.33                                                                                        |
| Temperature                       | 100.0 K                                              | 100.0 K                                                                                       |
| Wavelength                        | 0.71073 Å                                            | 0.71073 Å                                                                                     |
| Crystal System                    | Triclinic                                            | Monoclinic                                                                                    |
| Space Group                       | P-1                                                  | P 21/n                                                                                        |
| a                                 | 10.3925(15) Å                                        | 10.6157(18) Å                                                                                 |
| b                                 | 16.372(2) Å                                          | 17.277(2) Å                                                                                   |
| c                                 | 16.948(3) Å                                          | 10.7644(16) Å                                                                                 |
| α                                 | 93.428(5)°                                           | 90°                                                                                           |
| β                                 | 100.442(4)°                                          | 105.752(5)°                                                                                   |
| γ                                 | 98.703(4)°                                           | 90°                                                                                           |
| Volume                            | 2792.0(7) Å <sup>3</sup>                             | 1900.1(5) Å <sup>3</sup>                                                                      |
| Z, Z'                             | 4                                                    | 2, 0.5                                                                                        |
| Density (calculated)              | 1.417 Mg/m <sup>3</sup>                              | 1.502 Mg/m <sup>3</sup>                                                                       |
| Absorption Coefficient            | 0.499 mm <sup>-1</sup>                               | 0.730 mm <sup>-1</sup>                                                                        |
| F (000)                           | 1240                                                 | 880                                                                                           |
| Crystal Size                      | 0.22 x 0.16 x 0.14 mm <sup>3</sup>                   | 0.32 x 0.29 x 0.26 mm <sup>3</sup>                                                            |
| Theta range for data collection   | 1.680 to 24.999°                                     | 2.292 to 28.320°                                                                              |
| Index Ranges                      | -12≤h≤12, -19≤k≤19, -20≤l≤20                         | -13≤h≤14, -23≤k≤22, -14≤l≤14                                                                  |
| Reflections Collected             | 43409                                                | 17868                                                                                         |
| Independent Reflections           | 9838 [R(int) = 0.0554]                               | 4720 [R(int) = 0.0683]                                                                        |
| Completeness to Theta = 24.999°   | 99.9 %                                               | 99.9 %                                                                                        |
| Absorption Correction             | Semi-empirical from equivalents                      | Semi-empirical from equivalents                                                               |
| Max. and Min. Transmission        | 0.0926 and 0.0666                                    | 0.2627 and 0.2064                                                                             |
| Refinement Method                 | Full-matrix least-squares on F <sup>2</sup>          | Full-matrix least squares on F <sup>2</sup>                                                   |
| Data / Restraints / Parameters    | 9838 / 0 / 649                                       | 4720 / 0 / 220                                                                                |
| Goodness-of-fit on F <sup>2</sup> | 1.098                                                | 1.063                                                                                         |
| Final R Indices [I>2σ(I)]         | R1 = 0.0596, wR2 = 0.1531                            | R1 = 0.0363, wR2 = 0.0946                                                                     |
| R indices (all data)              | R1 = 0.0847, wR2 = 0.1745                            | R1 = 0.0402, wR2 = 0.0986                                                                     |
| Largest Diff. Peak and Hole       | 1.544 and -0.637 e.Å <sup>-3</sup>                   | 0.909 and -0.534 e.Å <sup>-3</sup>                                                            |

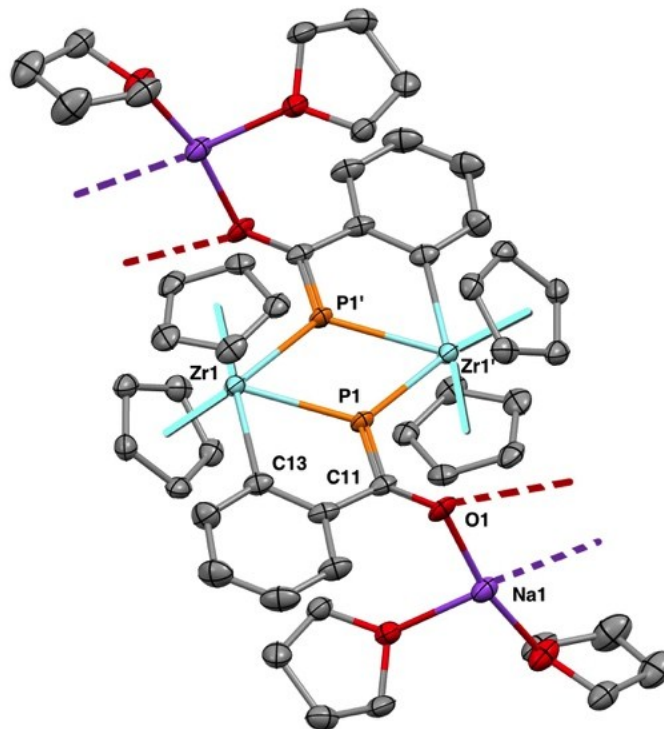

**Figure S12.** Molecular structure of **2** (ellipsoids set at 50% probability; hydrogen atoms, co-crystallized THF, and second coordination polymer chain omitted for clarity).

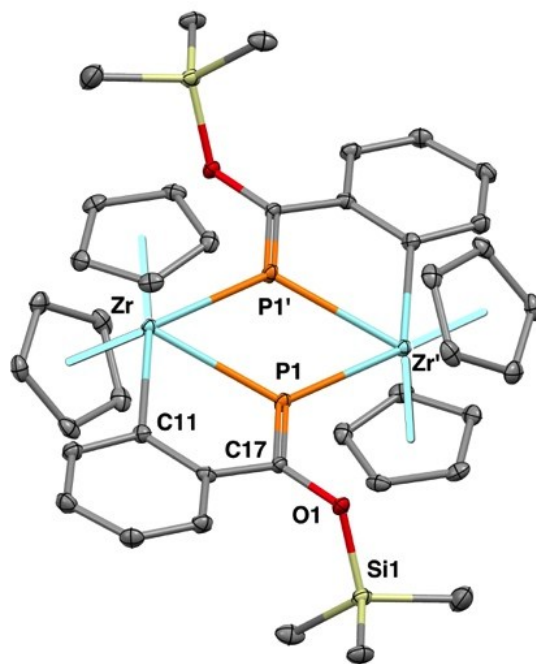

**Figure S13.** Molecular structure of **3** (ellipsoids set at 50% probability; hydrogen atoms omitted for clarity).



## 5. References

1. S. L. Buchwald, B. T. Watson and J. C. Huffman, *J. Am. Chem. Soc.* **1986**, *108*, 7411-7413.
2. F. F. Puschmann, D. Stein, D. Heift, C. Hendriksen, Z. A. Gal, H. F. Grutzmacher and H. Grutzmacher, *Angew. Chem. Int. Ed.* **2011**, *50*, 8420-8423.
3. G. L. Turner, K. A. Smith, R. J. Kirkpatrick and E. Oldfieldt, *J. Magn. Res.* **1986**, *70*, 408-415.
4. O. V. Dolomanov, L. J. Bourhis, R. J. Gildea, J. A. K. Howard and H. Puschmann, *J. Appl. Cryst.* **2009**, *42*, 339-341.
